1 **Human milk oligosaccharides reduce murine group B *Streptococcus* vaginal**  
2 **colonization with minimal impact on the vaginal microbiota**

3  
4 Marlyd E. Mejia<sup>a</sup>, Samantha Ottinger<sup>a</sup>, Alison Vrbanac<sup>b,\*</sup>, Priyanka Babu<sup>b</sup>, Jacob Zulk<sup>a</sup>,  
5 David Moorshead<sup>a</sup>, Lars Bode<sup>b,c</sup>, Victor Nizet<sup>b,d</sup>, and Kathryn A. Patras<sup>a,e,#</sup>.

6  
7 <sup>a</sup>Department of Molecular Virology and Microbiology, Baylor College of Medicine,  
8 Houston, Texas, USA;

9 <sup>b</sup>Department of Pediatrics, UC San Diego, La Jolla, California, USA;

10 <sup>c</sup>Larsson-Rosenquist Foundation Mother-Milk-Infant Center of Research Excellence, UC  
11 San Diego, La Jolla, California, USA;

12 <sup>d</sup>Skaggs School of Pharmacy and Pharmaceutical Sciences, UC San Diego, La Jolla,  
13 California, USA.

14 <sup>e</sup>Alkek Center for Metagenomics and Microbiome Research, Baylor College of Medicine,  
15 Houston, Texas, USA

16 \* Present affiliation: Siolta Therapeutics, San Carlos, California, USA

17

18 **Running title:** HMOs reduce GBS vaginal colonization

19 **#Corresponding author:** Kathryn Patras, PhD, email: [katy.patras@bcm.edu](mailto:katy.patras@bcm.edu)

20 **Abstract:** 219 words

21 **Importance:** 121 words

22 **Main text:** 4884 words

23

24

25 **ABSTRACT**

26 Group B *Streptococcus* (GBS) colonizes the vaginal mucosa of a significant percentage  
27 of healthy women and is a leading cause of neonatal bacterial infections. Currently,  
28 pregnant women are screened in the last month of pregnancy and GBS-positive women  
29 are given antibiotics during parturition to prevent bacterial transmission to the neonate.  
30 Recently, human milk oligosaccharides (HMOs) isolated from breastmilk were found to  
31 inhibit GBS growth and biofilm formation *in vitro*, and women that make certain HMOs are  
32 less likely to be vaginally colonized with GBS. Using *in vitro* human vaginal epithelial cells  
33 and a murine vaginal colonization model, we tested the impact of HMO treatment on GBS  
34 burdens and the composition of the endogenous microbiota by 16S rRNA amplicon  
35 sequencing. HMO treatment reduced GBS vaginal burdens *in vivo* with minimal  
36 alterations to the vaginal microbiota. HMOs displayed potent inhibitory activity against  
37 GBS *in vitro*, but HMO pretreatment did not alter adherence of GBS or the probiotic  
38 *Lactobacillus rhamnosus* to human vaginal epithelial cells. Additionally, disruption of a  
39 putative GBS glycosyltransferase ( $\Delta san\_0913$ ) rendered the bacterium largely resistant  
40 to HMO inhibition *in vitro* and *in vivo* but did not compromise its adherence, colonization,  
41 or biofilm formation in the absence of HMOs. We conclude that HMOs are a promising  
42 therapeutic bioactive to limit GBS vaginal colonization with minimal impacts on the vaginal  
43 microenvironment.

44

45 **IMPORTANCE**

46 During pregnancy, GBS ascension into the uterus can cause fetal infection or preterm  
47 birth. Additionally, GBS exposure during labor creates a risk of serious disease in the

48 vulnerable newborn and mother postpartum. Current recommended prophylaxis consists  
49 of administering broad-spectrum antibiotics to GBS-positive mothers during labor.  
50 Although antibiotics have significantly reduced GBS neonatal disease, there are several  
51 unintended consequences including altered neonatal gut bacteria and increased risk for  
52 other types of infection. Innovative preventions displaying more targeted antimicrobial  
53 activity, while leaving the maternal microbiota intact, are thus appealing. Using a mouse  
54 model, we found that human milk oligosaccharides (HMOs) reduce GBS burdens without  
55 perturbing the vaginal microbiota. We conclude that HMOs are a promising alternative to  
56 antibiotics to reduce GBS neonatal disease.

57

## 58 **INTRODUCTION**

59 Group B *Streptococcus* (GBS or *Streptococcus agalactiae*) is a Gram-positive bacterium  
60 that colonizes the gastrointestinal and vaginal tracts of ~18% of pregnant women globally  
61 (1), exposing more than 20 million infants to GBS at, or prior to, delivery (2). The majority  
62 of children born to GBS-positive women themselves become colonized without symptoms  
63 (3); however, a subset of these infants (>300,000 annually) develop invasive GBS  
64 infections accounting for upwards of 100,000 infant deaths each year around the globe  
65 (2). Additionally, 57,000 annual stillbirths are attributed to GBS infections (2), yet this may  
66 be an underestimate as this pathogen is also the most frequently cultured bacterium in  
67 mid-gestation spontaneous abortions (4). Because maternal GBS colonization is a risk  
68 factor for neonatal infections, universal screening in late pregnancy and intrapartum  
69 antibiotic prophylaxis (IAP) to GBS-positive or at-risk mothers is the current standard of  
70 care in many countries. These preventative measures have decreased, but not

71 eradicated, GBS early-onset disease (5). However, this early antibiotic exposure disrupts  
72 the infant microbiota and the potential adverse consequences of this perturbation are not  
73 fully established (6-10).

74  
75 Breastfeeding has long been associated with improved infant health, reduced risk of  
76 infectious disease, and accelerated immune and microbial maturation within the gut (11-  
77 13). Human milk oligosaccharides (HMOs), the third most abundant component of  
78 breastmilk, are a group of structurally complex, unconjugated glycans that are recalcitrant  
79 to host digestive enzymes. HMOs provide nutritional advantage for beneficial microbes in  
80 the infant gut and drive immune maturation at the gut epithelium (13-16). Moreover,  
81 HMOs may protect against neonatal pathogens by acting as soluble “decoy” receptors for  
82 enteric pathogens (17, 18), through neutralization of bacterial toxins (19, 20), or via direct  
83 antimicrobial activity including against GBS (21-24). Although the mechanism of HMO-  
84 mediated GBS inhibition is not known, GBS expression of a putative glycosyltransferase  
85 (locus *san\_0913*) is necessary for inhibitory activity (21), and HMO exposure lowers GBS  
86 sensitivity to antibiotics including vancomycin, erythromycin and trimethoprim (21, 25, 26).  
87 Additional support for HMO-mediated anti-GBS activity stems from clinical observations  
88 that mothers who produce a functional variant of the fucosyltransferase enzyme *FUT3*,  
89 which attaches fucose in an  $\alpha$ 1–3 or  $\alpha$ 1–4 linkage to form certain HMOs, are less likely  
90 to be vaginally colonized by GBS (27).

91  
92 We hypothesized that HMOs may reduce GBS vaginal colonization *in vivo* either through  
93 direct antimicrobial activity, or through indirect activity on the vaginal epithelium and/or

94 vaginal microbiota. Here, we test this hypothesis using a murine model of GBS vaginal  
95 colonization and pooled HMOs (pHMOs) isolated from human breastmilk. We further  
96 assess the impact of pHMOs on bacterial attachment to human vaginal epithelial cells  
97 and phenotypically characterize a GBS strain that is resistant to HMO inhibitory activity  
98 (21). Combined, our findings support the continued exploration of HMOs as a therapeutic  
99 strategy for GBS in pregnancy and the neonatal period.

100

## 101 **RESULTS**

### 102 **Topical pHMO treatment reduces GBS vaginal burdens *in vivo***

103 To determine the effect of HMOs on GBS vaginal colonization *in vivo*, wild-type C57BL/6J  
104 female mice were vaginally inoculated with GBS COH1, a serotype III ST17 neonatal  
105 sepsis clinical isolate (28). Mice were treated with pHMOs (1 mg/dose) 2 h prior to GBS  
106 inoculation, and on the following two consecutive days. Lacto-N-tetraose (LNT), a  
107 commercially produced HMO that inhibits GBS growth *in vitro* (21) was included as a  
108 treatment condition to test the efficacy of a single HMO. Vaginal swabs were collected  
109 prior to pHMO treatment on day 0, 1, and 2, as well as day 3 and 6 post-inoculation (**Fig.**  
110 **1A**). Treatment with pHMOs significantly reduced GBS vaginal burdens on day 1 ( $P =$   
111  $0.023$ ) and 2 ( $P = 0.009$ ) during active treatment, but these differences were resolved at  
112 day 3 and 6 after pHMO treatment had stopped (**Fig. 1B**). No differences between LNT  
113 and mock-treated groups were observed at any time point. Additionally, endogenous  
114 vaginal *Enterococcus* spp. were distinguished on the *Streptococcus* selective media, but  
115 no differences between treatment groups were detected (**Fig. 1C**).

116

117 **Vaginal epithelial HMO exposure does not impact adherence of GBS or probiotic**

118 ***Lactobacillus***

119 Because HMOs can reduce adherence of pathogens (29-31) and promote adherence of  
120 beneficial bacteria to the host epithelium (32), we tested the impact of epithelial HMO  
121 pretreatment on adherence of GBS or the probiotic *Lactobacillus rhamnosus* GG to  
122 human vaginal epithelial (VK2) cells. We observed no effect of pHMO or LNT  
123 pretreatment on GBS adherence to VK2 cells at two different concentrations (**Fig. 1D**),  
124 nor did HMO pretreatment alter *L. rhamnosus* adherence to VK2 cells (**Fig. 1E**).

125

126 **HMO resistance conferred by disruption of *san\_0913* does not alter GBS biofilm**  
127 **formation, adherence, susceptibility to antibiotics, or *in vivo* colonization in the**  
128 **absence of HMOs**

129 Although the exact mechanism of HMO anti-GBS activity has yet to be established,  
130 increased GBS sensitivity to intracellular targeting antibiotics and enhanced cell  
131 membrane permeability occur following HMO exposure (21, 25, 26). Additionally, HMO  
132 exposure perturbs multiple GBS metabolic pathways including those related to linoleic  
133 acid, sphingolipid, glycerophospholipid, and pyrimidine metabolism (26). A transposon  
134 mutant library screen identified the *gbs0738* gene (locus *san\_0913* or  
135 GBSCOH1\_RS04065 in COH1), a putative glycosyltransferase family 8 protein, as  
136 essential for GBS susceptibility to HMOs over a 7 h time course (21). Using a targeted  
137 insertional mutant of *san\_0913* (COH1  $\Delta$ *san\_0913*) (21), we assessed the growth of WT  
138 COH1 and  $\Delta$ *san\_0913* in the presence of 0-20 mg/mL pHMOs over 18 h. We found that  
139 growth of COH1 was significantly inhibited at all pHMO concentrations tested compared

140 to the mock control (**Fig. 2A,B**). Concentrations of 20 mg/mL and 10 mg/mL pHMO  
141 inhibited growth of  $\Delta san\_0913$  but to a lesser degree than seen with wild-type COH1 (**Fig.**  
142 **2A,B**). To determine whether *san\_0913* disruption altered GBS characteristics  
143 associated with colonization, we assessed the ability of  $\Delta san\_0913$  to form biofilms and  
144 attach to vaginal epithelial cells. We observed no differences between COH1 and  
145  $\Delta san\_0913$  biofilm formation in either bacteriologic (Todd-Hewitt broth, THB) or  
146 eukaryotic (RPMI-1640) media as measured by crystal violet staining (**Fig. 2C**).  
147 Additionally, we observed no differences in VK2 adherence between the COH1 and  
148  $\Delta san\_0913$  strains (**Fig. 2D**). In our *in vivo* model, we found no differences in vaginal  
149 GBS burdens between COH1 and  $\Delta san\_0913$  (**Fig. 2E**). However, when mice were  
150 treated with pHMOs as in **Fig. 1A**,  $\Delta san\_0913$  displayed significantly higher GBS burdens  
151 at day 1 post-inoculation ( $P = 0.007$ ) during active pHMO treatment, but this difference  
152 resolved at later time points (**Fig. 2F**). Furthermore, we performed minimum inhibitory  
153 concentration (MIC) assays of a variety of antibiotic classes, hydrogen peroxide, and  
154 dimethyl sulfoxide (DMSO). MICs were determined by a >90% reduction in OD<sub>600</sub> values  
155 compared to controls. No differences in MICs between COH1 and  $\Delta san\_0913$  were  
156 observed with any compound tested (**Supp. Table 1**).

157

### 158 **pHMO treatment minimally impacts the endogenous murine vaginal microbiota in** 159 **the presence or absence of GBS**

160 We previously identified that GBS introduction to the murine vaginal tract causes  
161 community instability, particularly a decrease in *Staphylococcus succinus*, a dominant  
162 vaginal microbe in C57BL/6J mice (33). Because HMOs are metabolized by a variety of

163 bacteria in the neonatal intestinal tract (34-38), and since maternal serum HMO levels  
164 correlate with specific taxa in the maternal urinary and vaginal microbiota (39), we  
165 investigated whether pHMO treatment impacted the murine vaginal microbiota in the  
166 presence or absence of GBS perturbation. Using swabs collected from the murine  
167 experiments as outlined in **Fig. 1A**, 16S rRNA amplicon sequencing was used to  
168 characterize shifts in the vaginal microbiota of Control (mock-treated, mock-infected),  
169 pHMO (treated, mock-infected), Control\_GBS (mock-treated, GBS-infected), and  
170 pHMO\_GBS (treated, GBS-infected) mice. The alpha diversity, as measured by  
171 Shannon's diversity index, significantly increased in Control\_GBS and pHMO\_GBS  
172 groups regardless of treatment compared to controls (**Fig. 3A**). However, in the absence  
173 of GBS, alpha diversity was not impacted in the pHMO versus Control groups at any time  
174 point (**Fig. 3A**). As observed previously (33), mice that received GBS showed heightened  
175 community instability compared to mock-infected controls as measured by Bray-Curtis  
176 distance between time points. This effect was seen both in the presence (pHMO\_GBS,  $P$   
177 = 0.0048) and absence (Control\_GBS,  $P$  = 0.0073) of pHMO treatment for the pairwise  
178 comparisons between days 2 and 3 (**Fig. 3B**). No impact upon community stability was  
179 observed with pHMO treatment in the absence of GBS (pHMO, **Fig. 3B**).

180  
181 Across all four conditions, no significant differences were observed in community richness  
182 over the 6-day time course as measured by observed operational taxonomic units (OTUs,  
183 **Supp. Fig. 1A**). Mice exposed to GBS (Control\_GBS and pHMO\_GBS), regardless of  
184 treatment, experienced a significant drop in the relative abundance of *S. succinus*  
185 compared to Control mice starting at day 1, and this effect continued throughout the



186 sampling period (**Fig. 3C**). No differences in the relative abundance of *Enterococcus* spp.  
187 or *Lactobacillus* spp., the two next most abundant endogenous OTUs, were observed  
188 between groups (**Supp. Fig. 1B, 1C**). ANCOM analysis (40) identified *Bacteroides* as the  
189 only significantly differentially abundant taxa across the four groups, with increased  
190 abundance in pHMO\_GBS mice compared to all other groups (**Fig. 3D**).

191

### 192 **Murine vaginal community state types (mCSTs) display minimal differential** 193 **stability upon pHMO treatment in the presence or absence of GBS**

194 The human vaginal microbiome, and more recently the murine vaginal microbiome, are  
195 classified into community state types (CSTs) (41) and murine community state types  
196 (mCSTs) respectively (33). In humans, four of the CSTs are each dominated by different  
197 *Lactobacillus* species, and the remaining CSTs had a non-*Lactobacillus* dominant taxa or  
198 diverse array of facultative and strictly anaerobic bacteria (41). In C57BL/6J mice from  
199 Jackson Labs, the vaginal microbiome is separated into 5 mCSTs dominated by either *S.*  
200 *succinus*, *Enterococcus*, a mixture of *S. succinus/Enterococcus*, *Lactobacillus*, or a  
201 mixture of different taxa (33). In this study, we detected all five of these mCSTs by  
202 hierarchical clustering with Ward's linkage of Euclidean distances of day 0 swab samples  
203 prior to GBS infection and/or pHMO treatment (**Supp. Fig. 2**). When analyzing the  
204 collection of samples from all four groups across all time points, we observed the  
205 emergence of three GBS-containing groups: GBS dominant (mCST VI), GBS and *S.*  
206 *succinus* present at similar levels (mCST IV), and *S. succinus* dominant with lower  
207 abundances of GBS or *Enterococcus* (mCST II) (**Fig. 4**).

208

209 To assess if mice differentially transitioned between mCSTs across treatment groups, we  
210 tracked mCSTs in individual mice over time. Like our prior study (33), we found that  
211 mCSTs were relative unstable, with 43% of uninfected and 87% of GBS-infected mice  
212 being categorized to two or more mCSTs over the time course (**Fig. 5**). Using Bray-Curtis  
213 first distances for microbial communities within individual mice, we compared the  
214 instability between the baseline composition and the subsequent time points. Although  
215 there were no differences in longitudinal stability between Control and pHMO groups ( $P=$   
216 0.2036), Bray-Curtis first distances were higher in pHMO\_GBS versus Control\_GBS mice  
217 ( $P= 0.0281$ ) (**Fig. 5**).

218  
219 Although mCST I (*S. succinus* dominant) was the most commonly appearing mCST in  
220 Control and pHMO groups, mCST II appeared with significantly more frequency in the  
221 Control group ( $P=0.0404$ ) and mCST I appeared with more frequency in the pHMO group  
222 ( $P= 0.0067$ ) (**Fig. 6A**). No significant differences in mCST frequencies were observed  
223 between Control\_GBS and pHMO\_groups with mCST II, mCST IV, and mCST VI  
224 representing the most abundant mCSTs in both GBS-infected groups (**Fig. 6A**). As seen  
225 previously (33), mCST I was the most stable community state: combining all conditions  
226 and samples with successfully sequenced consecutive timepoints, 84/109 (77%) of  
227 mCST I samples were assigned mCST I at the next time point (self-transition). mCST VI  
228 (GBS dominant) was the next most stable, followed by mCST II, mCST III, mCST V, and  
229 mCST IV (**Fig. 6B**). When separated by treatment groups, we found that mCST I was  
230 more likely to self-transition in the pHMO group compared to Control group ( $P = 0.0401$ )  
231 whereas mCST II was more likely to self-transition in the Control group compared to the

232 pHMO group ( $P = 0.0031$ ) (**Fig. 6C**). In GBS-infected animals, no significant differences  
233 in mCST self-transitions were observed between Control\_GBS and pHMO\_GBS groups  
234 (**Fig. 6C**).

235

## 236 **DISCUSSION**

237 GBS remains a pervasive pathogen in pregnancy and the neonatal period. Current IAP  
238 prevention strategies have not fully abolished GBS neonatal infections and IAP is  
239 ineffective in preventing GBS infection prior to parturition. Because of the adverse effects  
240 of antibiotic exposure on the endogenous microbiota and propagation of antibiotic  
241 resistance, discovery of more targeted antimicrobial therapies to control maternal GBS  
242 carriage is important for maternal and neonatal health. Here, we apply HMOs, natural  
243 products produced by the mammary gland during pregnancy and lactation, to *in vitro* and  
244 murine models of GBS vaginal colonization. HMOs are known for simultaneous prebiotic  
245 benefits on commensal bacteria (14, 34, 38) and antimicrobial activity towards pathogens  
246 including GBS (21-24). To our knowledge, this is the first application of HMOs as a vaginal  
247 therapy *in vivo*. We propose that HMOs possess promising anti-GBS activity in this  
248 environment with minimal impact on the vaginal microbiota.

249

250 Our animal model demonstrated that pHMO treatment reduced GBS vaginal carriage, but  
251 this effect was only seen during active treatment with no sustained impact observed after  
252 treatment ceased (**Fig. 1**). This finding aligns with other murine models showing  
253 protective effects of HMOs in reducing pathogen colonization (31, 42-44). Using human  
254 vaginal epithelial cells (VK2), we observed no changes in bacterial adherence when cells

255 were pretreated with pHMOs. This observation is distinct from work showing HMO-  
256 mediated inhibition of pathogens (31, 45-47) or enhanced attachment of beneficial  
257 bacteria (32, 48-50) at the gastrointestinal mucosa. Other studies have observed no  
258 impact of pHMO treatment on certain pathogens (51) or on pathogen colonization of other  
259 epithelial surfaces such as the bladder (52). These results suggest that prior mechanisms  
260 seen with HMOs and the gut epithelium may absent in the vaginal epithelium or with the  
261 bacterial species we tested.

262  
263 There are several limitations to this HMO treatment model. First, we did not optimize  
264 dosage, timing, or length of pHMO treatment. Second, although LNT shows potent *in vitro*  
265 anti-GBS activity (21), this did not translate to an *in vivo* GBS reduction, and thus the  
266 specific HMOs responsible for GBS reduction in our animal model are currently unknown.  
267 A clinical study found that Lewis positive women, who generate certain fucosylated  
268 HMOs, display reduced GBS vaginal carriage and infant colonization at birth (27).  
269 Specifically, levels of lacto-N-difucohexaose I (LNDFHI) in breastmilk samples negatively  
270 correlated with maternal GBS colonization status and reduced GBS growth *in vitro* (27).  
271 Third, HMOs and their fermentation products have multiple known gastrointestinal  
272 epithelial and immune modulatory activities (53-56). Likewise, it is possible that HMOs  
273 can act indirectly through altering host vaginal responses to GBS, however this was not  
274 evaluated in our study. Lastly, using murine models to test whether HMOs possess  
275 potential therapeutic activity in preventing GBS neonatal transmission and adverse birth  
276 outcomes (57, 58) will be an important application of our findings.

277

278 Although the exact mechanism of anti-GBS activity by HMOs is unknown, GBS  
279 susceptibility is linked to expression of a GBS-specific putative glycosyltransferase (locus  
280 *san\_0913*) thought to catalyze the addition of glucose or galactose residues to the cell  
281 surface and thus may enable incorporation of HMOs into the GBS cell wall (21). In prior  
282 work, a glycosyltransferase-deficient  $\Delta san_0913$  strain showed resistance to HMO  
283 inhibition (5 mg/mL) over 7 h of culture (21). In our growth analysis, we confirmed this  
284 finding extended out to 18 h (**Fig. 2**). At higher concentrations (10 and 20 mg/mL)  
285 matching physiologic concentration of HMOs in human colostrum and breastmilk (59, 60),  
286  $\Delta san_0913$  growth was inhibited, but not to the same extent as wild type COH1,  
287 suggesting that this deficiency does not completely resolve anti-GBS activity of HMOs.  
288 Recent work has shown that HMOs induced multiple GBS stress responses related to  
289 cell membrane and cell wall components (26), but the role of *san\_0913* in this GBS  
290 response has not been established. While streptococcal glycosyltransferase activity has  
291 been implicated in biofilm formation and composition in *S. mutans* (61), our phenotypic  
292 analyses did not reveal any substantial deficits in the glycosyltransferase-deficient  
293  $\Delta san_0913$  in terms of biofilm formation, vaginal cell adherence, or *in vivo* vaginal  
294 colonization in the absence of HMO treatment. These results may have important clinical  
295 implications for HMO therapies and emergence of spontaneous HMO-resistant GBS  
296 under selective pressure.

297

298 HMOs serve as prebiotics for beneficial microbes in the gut by promoting the  
299 establishment of *Bifidobacteria* and *Bacteroides* (37, 38, 62). Mammary HMO production  
300 begins early in pregnancy and is detected in maternal circulation in the first trimester (63).

301 Moreover, maternal serum levels of two abundant HMOs (2'-FL and 3'-SL) positively  
302 correlate with vaginal *Gardnerella spp.* and *L. crispatus* respectively (39), providing a  
303 basis for the hypothesis that HMOs might not only shape neonatal microbiota and  
304 immunity, but also maternal vaginal microbiota. Whether HMOs have the potential to  
305 directly impact the vaginal microbiome in humans has not been determined, however, a  
306 common vaginal species, *L. gasseri*, lacks the ability to metabolize HMOs (34). Because  
307 of the well-known prebiotic effects of HMOs on the infant microbiota, we examined the  
308 impact of pHMOs on the murine vaginal microbiota in our colonization model. We found  
309 minimal pHMO-driven changes to the community composition in terms of alpha and beta  
310 diversity (**Fig. 3**). The most marked difference between groups in our model was the  
311 emergence of *Bacteroides* in mice dually inoculated with GBS and treated with pHMOs  
312 (**Fig. 3D**). While the relative abundance of *Bacteroides* remained below 5% of the entire  
313 microbial landscape in the majority of mice, 0.1-5% abundance is estimated to account  
314 for  $\sim 10^5$ - $10^6$  total CFU in the murine vaginal tract. In women, the vaginal microbiota  
315 postpartum shows community instability and increases in *Bifidobacterium* and  
316 *Bacteroides* (64, 65), but the mechanisms driving these changes are unknown. Whether  
317 HMOs can be detected in the human vagina during pregnancy and lactation, and whether  
318 human vaginal microbes can metabolize HMOs are important topics of future study.

319

320 There are several limitations to the interpretation of our murine vaginal microbiome data.  
321 First and foremost, the murine vaginal microbiome does not fully reflect the human vaginal  
322 microbiome in terms of species present; although there is an mCST dominated by a  
323 murine *Lactobacillus* (**Supp. Fig. 2**), it is a rare community in C57BL/6J mice (33). As a

324 future direction, we seek to use humanized microbiota mice to assess pHMO-mediated  
325 changes to the vaginal microbiota in the presence of human vaginal bacteria, such as  
326 that done in mouse models colonized with human gastrointestinal microbiota and treated  
327 with HMOs (42, 66). In women, GBS is present at low relative abundance in the vagina  
328 (67) whereas in our mouse model, GBS becomes a dominant member of vaginal  
329 community in some mice upon introduction (**Fig. 4**). This high relative abundance may  
330 alter dynamics of GBS and other vaginal taxa distinct from human vaginal communities.  
331 Additionally, the length of HMO treatment may need to be extended to observe larger  
332 effects. Prior studies have described more pronounced HMO-mediated shifts to the gut  
333 microbiota of both conventional (44, 68) and humanized microbiota mice (66), however,  
334 the length of HMO treatment in these studies was longer than in our model (3-8 weeks  
335 vs. 3 days respectively).

336

337 By combining our prior (33) and current studies, we found that the vaginal microbiome of  
338 the C57BL/6J mice from Jackson labs is highly consistent across cohorts over several  
339 years. In both studies, we found that GBS introduction increases vaginal community  
340 instability and reduces the relative abundance of the most abundant taxa *S. succinus*.  
341 Additionally, we confirmed our prior observation that mCST I (*S. succinus*-dominant) is  
342 the most stable murine community over time. These consistencies highlight the utility of  
343 this murine model in comparing different experimental groups across cohorts and  
344 experimental variables.

345

346 In summary, we have demonstrated HMOs can reduce GBS vaginal colonization in an

347 animal model with minimal impacts on the vaginal microbiota. There is mounting evidence  
348 that HMOs play an important role in shaping the infant gut microbiota and preventing  
349 pathogen colonization. HMO introduction to the vaginal tract may provide similar  
350 beneficial effects. These findings expand our knowledge of therapeutic applications of  
351 HMOs and support their continued development as a target for controlling GBS  
352 colonization in women.

353

## 354 **MATERIALS & METHODS**

355

### 356 **Reagents, bacterial strains, and cell lines**

357 Pooled HMOs were isolated from human milk samples collected through the human milk  
358 donation program at the University of California, San Diego, lyophilized and stored at -  
359 20° C as previously described (69). Individual HMO lacto-N-tetraose (LNT) was  
360 purchased from Dextra Laboratories. Prior to use, HMOs were resuspended in molecular  
361 grade water to a final concentration of 100 mg/mL, and subsequent dilutions were made  
362 in cell culture media (*in vitro*) or molecular grade water (*in vivo*).

363

364 Group B *Streptococcus* (GBS) strains used in this study include COH1 (ATCC BAA-1176)  
365 and isogenic  $\Delta san\_0913$  generated previously (21). Strains were grown for at least 16 h  
366 to stationary phase at 37°C in Todd-Hewitt Broth (THB) prior to experiments with 5 µg/mL  
367 erythromycin added to  $\Delta san\_0913$  cultures. Prior to *in vitro* and *in vivo* experiments,  
368 overnight cultures were diluted 1:10 in fresh THB, and incubated stationary at 37°C until  
369 mid-log phase ( $OD_{600nm} = 0.4$ ). *Lactobacillus rhamnosus* GG (ATCC 53103) was grown



370 for 16 h to stationary phase at 37°C without shaking in de Man, Rogosa and Sharpe  
371 (MRS) broth.

372

373 Immortalized human vaginal epithelial cells (VK2/E6E7, ATCC CRL-2616) were cultured  
374 in keratinocyte serum-free medium (KSFM) (Gibco) with 0.5 ng/mL human recombinant  
375 epidermal growth factor and 0.05 mg/mL bovine pituitary extract. Cells were cultured in a  
376 37°C incubator with 5% CO<sub>2</sub>. Cells were split every 3-4 days at ~80% confluency, and  
377 0.25% trypsin/2.21 mM EDTA (Corning) were used to detach cells for passaging.

378

### 379 **GBS growth kinetics**

380 For growth curves, log phase GBS cultures were diluted 1:10 in RPMI-1640 (Gibco) in  
381 96-well microtiter plates with 20, 10, 5, or 2.5 mg/mL pHMOs or carrier control in 200 µL  
382 total volume. Wells with pHMOs and media only were also included to confirm absence  
383 of microbial contamination. Plates were incubated at 37°C and absorbance at OD<sub>600nm</sub>  
384 was read every 15 min for 18 h using a BioTek Cytation 5 multi-mode plate reader.

385

### 386 **Biofilm assays**

387 GBS biofilm assays were performed as described previously (70). Briefly, overnight  
388 cultures were diluted to OD<sub>600nm</sub> = 0.1 in RPMI-1640 or THB and incubated at 37°C for  
389 24 h. Media was removed, and biofilms were washed twice with PBS before drying at  
390 55°C for 30 min. Biofilms were stained with 0.2% crystal violet for 30 min, washed with  
391 PBS three times, and destained with 80:20 ethanol:acetone mixture. Supernatant was  
392 transferred to a fresh 96-well plate and absorbance was read at OD<sub>595nm</sub> using a BioTek

393 Cytation 5 multi-mode plate reader. Values were normalized to total bacterial growth prior  
394 to washing and staining and data were expressed as a ratio of crystal violet staining to  
395 total bacterial growth (OD<sub>595</sub>:OD<sub>600</sub>).

396

### 397 **Minimum inhibitory concentration (MIC) assays**

398 MICs were performed as described previously with minor adaptations (71). Mid-log phase  
399 cultures were diluted 1:100 in THB with or without H<sub>2</sub>O<sub>2</sub>, DMSO (Fisher Scientific),  
400 trimethoprim (Sigma), chloramphenicol (Fisher Scientific), and vancomycin (Sigma) at  
401 concentrations listed in **Supp. Table 1** in 100  $\mu$ L total volume in 96-well microtiter plates.  
402 Plates were incubated stationary for 24 h at 37°C. The MICs were determined by at >90%  
403 reduction in OD<sub>600</sub> absorbance compared to control wells.

404

### 405 **Adherence assays**

406 GBS adherence assays were performed on confluent VK2 cells in 24-well plates as  
407 described previously (72, 73). For studies using HMOs, media was replaced with KSFM  
408 containing 3mg/mL or 6 mg/mL of pHMO, LNT or vehicle control for 18 h. Cells were  
409 infected with GBS COH1,  $\Delta$ *san\_0913*, or *L. rhamnosus* at MOI = 1 (assuming  $1 \times 10^5$   
410 VK2 cells per well). Bacteria was brought into contact with the VK2 cells by centrifuging  
411 for 1 min at 300  $\times$  g. After 30 min, supernatant was removed and cells washed 6X with  
412 sterile PBS. Cell layers were incubated for 5 min with 100  $\mu$ L 0.25% trypsin/2.21 mM  
413 EDTA after which 400  $\mu$ L of 0.025% Triton-X in PBS was added. Wells were mixed 30X  
414 to ensure detachment, and bacterial recovery was determined by plating on THB or MRS  
415 agar plates using serial dilution and counting CFUs. Data were expressed as a

416 percentage of adherent CFUs compared to original inoculum.

417

## 418 **Animals**

419 Animal experiments were approved by the UC San Diego and Baylor College of Medicine  
420 Institutional Animal Care and Use Committees (IACUC) and conducted under accepted  
421 veterinary standards. Mice were allowed to eat and drink *ad libitum*. WT C57Bl/6J female  
422 mice, originally purchased from Jackson Laboratories, aged 7 weeks, were allowed to  
423 acclimate for one week prior to experiments.

424

## 425 **Murine GBS vaginal colonization model**

426 Vaginal colonization studies were conducted as described previously (74). Briefly, mice  
427 were synchronized with 0.5mg  $\beta$ -estradiol administered intraperitoneally (i.p.) 24 h prior  
428 to inoculation. Mice were inoculated with 10 $\mu$ L ( $1 \times 10^7$  CFU total) of GBS COH1 or PBS  
429 as a mock control into the vaginal tract. Where applicable, mice were administered 1 mg  
430 (10  $\mu$ L of 100 mg/mL) pHMOs, LNT, or vehicle control into the vaginal lumen two hours  
431 post-inoculation. Vaginal swabs were collected daily and recovered GBS (identified as  
432 pink/mauve colonies) was quantified by plating on CHROMagar StrepB (DRG  
433 International Inc.). Growth of blue colonies was considered endogenous *Enterococcus*  
434 spp. based on manufacturer protocols. Where applicable, mice received additional HMO  
435 or mock treatments on days 1 and 2 immediately following swab collection. Remaining  
436 swab samples were stored at -20° C until further use.

437

## 438 **Sample processing and 16S rRNA amplicon sequencing**

439 DNA was extracted from thawed bacterial swab suspensions using the Quick-DNA  
440 Fungal/Bacterial Microprep Kit protocol (Zymo Research). The V4 regions of the 16S  
441 rRNA gene were amplified using barcoded 515F-806R primers (75), and the resulting V4  
442 amplicons were sequenced on an Illumina MiSeq. Raw sequencing data were transferred  
443 to Qiita (76). Sequences were demultiplexed, trimmed to 150-bp reads, and denoised  
444 using Deblur through QIIME2 v2020.8 (77). Qiime2 was also used for rarefaction (1900  
445 sequences per sample), and calculation of alpha diversity (Shannon and OTUs) and beta  
446 diversity (Bray-Curtis distance). For ANCOM (40) analysis for differentially abundant  
447 OTUs, the nonrarefied feature table was used. Taxonomic assignments used the naive  
448 bayes sklearn classifier in QIIME 2 trained on the 515F/806R region of Greengenes 13\_8  
449 99% OTUs. As many of the samples were low biomass, DNA contaminants from  
450 sequencing reagents and kits had a substantial impact on the dataset. Negative controls  
451 that went through the entire pipeline, from DNA extraction to sequencing, were used to  
452 catalog these contaminants (*Pseudomonas veronii*). Mitochondria and chloroplast 16S  
453 sequences were also removed. Output files generated through the Qiime2 pipeline were  
454 exported and analyzed with R version 3.6.1 (2019-07-05) -- "Action of the Toes" using  
455 stats, factoextra, and Phyloseq (78, 79). Data visualization was performed with ggplot2  
456 (80) and Seaborn (81).

457

### 458 **Community State Type (CST) delineation**

459 Feature tables and representative sequences generated from three individual studies  
460 were merged and used to generate a taxonomy file. Two more studies from our prior work  
461 (33) were downloaded from EBI accession number PRJEB25733 in addition to the current

462 study (EBI accession XXXX) for **Supp. Fig. 2** depicting the Baseline CSTs. To assign  
463 mCSTs and create heatmaps, hierarchical clustering was performed using the R package  
464 stats (79) on the rarefied feature table with Ward's linkage of Euclidean distances. The  
465 optimum number of clusters (5 mCSTs) was determined using wss and silhouette  
466 (kmeans) based on the dendrogram. For EBI accession number XXXX (this study) alone,  
467 including all experimental conditions and time points, we added an additional GBS-  
468 dominant mCST as modeled by (33). For within-mouse assessment of instability and  
469 mCST transitioning, samples with only one time point collected were excluded. Samples  
470 that did not successfully sequence at the baseline (Day 0) time point were excluded from  
471 Bray-Curtis first distances analysis.

472

### 473 **Data availability**

474 Sequencing Data used in this study is available in EBI under the accession number XXXX,  
475 and code is accessible at GitHub under project "XXXX".

476

### 477 **Statistics**

478 All data were collected from at least three biological replicates performed in at least  
479 technical duplicate as part of at least two independent experiments. When biological  
480 replicates were not available (e.g. immortalized cell lines and bacteria only assays),  
481 experiments were performed independently at least 3 times. Mean value from technical  
482 replicates were used for statistical analyses, with independent experiment values or  
483 biological replicates represented in graphs with mean, median with interquartile ranges,  
484 or box and whisker plots with Tukey's as indicated in figure legends. All data sets were

485 subjected to D'Agostino & Pearson normality test to determine whether values displayed  
486 Gaussian distribution before selecting the appropriate parametric or non-parametric  
487 analyses. In the instances where *in vitro* and *in vivo* experimental n were too small to  
488 determine normality, data were assumed non-parametric. GBS vaginal colonization  
489 burdens were assessed by Kruskal Wallis with Dunn's multiple comparisons test or two-  
490 stage Mann-Whitney test as indicated in figure legends. GBS adherence to VK2 cells was  
491 assessed by or two-way ANOVA with Dunnett's multiple comparisons test or Wilcoxon  
492 matched-pairs signed rank test as indicated in figure legends. GBS growth (area under  
493 curve) and biofilm formation was compared by two-way repeated measures ANOVA with  
494 Dunnett's multiple comparisons test and two-way ANOVA with Sidak's multiple  
495 comparisons test respectively. Data from 16S rRNA amplicon sequencing was analyzed  
496 by two-way ANOVA with Tukey's comparison. Bray-Curtis first distances were analyzed  
497 by Mann-Whitney test. mCST transition frequencies were compared by chi square test.  
498 Statistical analyses were performed using GraphPad Prism, version 9.2.0 (GraphPad  
499 Software Inc., La Jolla, CA, USA). *P* values < 0.05 were considered statistically  
500 significant.

501

## 502 **AUTHOR CONTRIBUTIONS**

503 KAP, LB, and VN conceived and designed experiments. KAP, MEM, SO, AV, PB, JZ, and  
504 DM performed experiments. KAP, MEM, and AV analyzed and interpreted results. MEM  
505 and KAP drafted the manuscript. All authors contributed the discussion/manuscript edits.

506

## 507 **ACKNOWLEDGEMENTS**

508 MM and JZ were supported by an NIH T32 award (T32GM136554). KP was supported  
509 by postdoctoral fellowships from the Hartwell Foundation and the University of California  
510 Chancellor's Postdoctoral Fellowship Program, and a Research Scholar Award from the  
511 American Urological Association. Studies were supported by the Caroline Wiess Law  
512 Fund for Research in Molecular Medicine at Baylor College of Medicine, the Burroughs  
513 Wellcome Fund Next Gen Pregnancy Initiative (NGP10103), and by a Seed grant made  
514 available through the UC San Diego Larsson-Rosenquist Foundation Mother-Milk-Infant  
515 Center of Research Excellence. The support of the Family Larsson-Rosenquist  
516 Foundation is gratefully acknowledged. The funders had no role in study design, data  
517 collection and interpretation, or the decision to submit the work for publication.

518

## 519 REFERENCES

- 520 1. Russell NJ, Seale AC, O'Driscoll M, O'Sullivan C, Bianchi-Jassir F, Gonzalez-Guarin J,  
521 Lawn JE, Baker CJ, Bartlett L, Cutland C, Gravett MG, Heath PT, Le Doare K, Madhi SA,  
522 Rubens CE, Schrag S, Sobanjo-Ter Meulen A, Vekemans J, Saha SK, Ip M, Group  
523 GBSMCI. 2017. Maternal Colonization With Group B Streptococcus and Serotype  
524 Distribution Worldwide: Systematic Review and Meta-analyses. *Clin Infect Dis* 65:S100-  
525 S111.
- 526 2. Seale AC, Bianchi-Jassir F, Russell NJ, Kohli-Lynch M, Tann CJ, Hall J, Madrid L,  
527 Blencowe H, Cousens S, Baker CJ, Bartlett L, Cutland C, Gravett MG, Heath PT, Ip M, Le  
528 Doare K, Madhi SA, Rubens CE, Saha SK, Schrag SJ, Sobanjo-Ter Meulen A, Vekemans  
529 J, Lawn JE. 2017. Estimates of the Burden of Group B Streptococcal Disease Worldwide  
530 for Pregnant Women, Stillbirths, and Children. *Clin Infect Dis* 65:S200-S219.
- 531 3. Le Doare K, Heath PT. 2013. An overview of global GBS epidemiology. *Vaccine* 31 Suppl  
532 4:D7-12.
- 533 4. McDonald HM, Chambers HM. 2000. Intrauterine infection and spontaneous midgestation  
534 abortion: is the spectrum of microorganisms similar to that in preterm labor? *Infect Dis*  
535 *Obstet Gynecol* 8:220-7.
- 536 5. Phares CR, Lynfield R, Farley MM, Mohle-Boetani J, Harrison LH, Petit S, Craig AS,  
537 Schaffner W, Zansky SM, Gershman K, Stefonek KR, Albanese BA, Zell ER, Schuchat A,  
538 Schrag SJ, Active Bacterial Core surveillance/Emerging Infections Program N. 2008.  
539 Epidemiology of invasive group B streptococcal disease in the United States, 1999-2005.  
540 *JAMA* 299:2056-65.
- 541 6. Azad MB, Konya T, Persaud RR, Guttman DS, Chari RS, Field CJ, Sears MR, Mandhane  
542 PJ, Turvey SE, Subbarao P, Becker AB, Scott JA, Kozyrskyj AL, Investigators CS. 2016.  
543 Impact of maternal intrapartum antibiotics, method of birth and breastfeeding on gut  
544 microbiota during the first year of life: a prospective cohort study. *BJOG* 123:983-93.



- 545 7. Mazzola G, Murphy K, Ross RP, Di Gioia D, Biavati B, Corvaglia LT, Faldella G, Stanton  
546 C. 2016. Early Gut Microbiota Perturbations Following Intrapartum Antibiotic Prophylaxis  
547 to Prevent Group B Streptococcal Disease. *PLoS One* 11:e0157527.
- 548 8. Parnanen K, Karkman A, Hultman J, Lyra C, Bengtsson-Palme J, Larsson DGJ, Rautava  
549 S, Isolauri E, Salminen S, Kumar H, Satokari R, Virta M. 2018. Maternal gut and breast  
550 milk microbiota affect infant gut antibiotic resistance and mobile genetic elements. *Nat*  
551 *Commun* 9:3891.
- 552 9. Li H, Xiao B, Zhang Y, Xiao S, Luo J, Huang W. 2019. Impact of maternal intrapartum  
553 antibiotics on the initial oral microbiome of neonates. *Pediatr Neonatol* 60:654-661.
- 554 10. Patras KA, Nizet V. 2018. Group B Streptococcal Maternal Colonization and Neonatal  
555 Disease: Molecular Mechanisms and Preventative Approaches. *Front Pediatr* 6:27.
- 556 11. Frank NM, Lynch KF, Uusitalo U, Yang J, Lonnot M, Virtanen SM, Hyoty H, Norris JM,  
557 Group TS. 2019. The relationship between breastfeeding and reported respiratory and  
558 gastrointestinal infection rates in young children. *BMC Pediatr* 19:339.
- 559 12. Stewart CJ, Ajami NJ, O'Brien JL, Hutchinson DS, Smith DP, Wong MC, Ross MC, Lloyd  
560 RE, Doddapaneni H, Metcalf GA, Muzny D, Gibbs RA, Vatanen T, Huttenhower C, Xavier  
561 RJ, Rewers M, Hagopian W, Toppari J, Ziegler AG, She JX, Akolkar B, Lernmark A, Hyoty  
562 H, Vehik K, Krischer JP, Petrosino JF. 2018. Temporal development of the gut microbiome  
563 in early childhood from the TEDDY study. *Nature* 562:583-588.
- 564 13. Donovan SM, Comstock SS. 2016. Human Milk Oligosaccharides Influence Neonatal  
565 Mucosal and Systemic Immunity. *Ann Nutr Metab* 69 Suppl 2:42-51.
- 566 14. Sela DA, Chapman J, Adeuya A, Kim JH, Chen F, Whitehead TR, Lapidus A, Rokhsar  
567 DS, Lebrilla CB, German JB, Price NP, Richardson PM, Mills DA. 2008. The genome  
568 sequence of *Bifidobacterium longum* subsp. *infantis* reveals adaptations for milk utilization  
569 within the infant microbiome. *Proc Natl Acad Sci U S A* 105:18964-9.
- 570 15. Bode L. 2012. Human milk oligosaccharides: every baby needs a sugar mama. *Glycobiology*  
571 22:1147-62.
- 572 16. Triantis V, Bode L, van Neerven RJJ. 2018. Immunological Effects of Human Milk  
573 Oligosaccharides. *Front Pediatr* 6:190.
- 574 17. Newburg DS. 2009. Neonatal protection by an innate immune system of human milk  
575 consisting of oligosaccharides and glycans. *J Anim Sci* 87:26-34.
- 576 18. Laucirica DR, Triantis V, Schoemaker R, Estes MK, Ramani S. 2017. Milk  
577 Oligosaccharides Inhibit Human Rotavirus Infectivity in MA104 Cells. *J Nutr* 147:1709-  
578 1714.
- 579 19. Newburg DS, Pickering LK, McCluer RH, Cleary TG. 1990. Fucosylated oligosaccharides  
580 of human milk protect suckling mice from heat-stable enterotoxin of *Escherichia coli*. *J*  
581 *Infect Dis* 162:1075-80.
- 582 20. Idota T, Kawakami H, Murakami Y, Sugawara M. 1995. Inhibition of cholera toxin by  
583 human milk fractions and sialyllactose. *Biosci Biotechnol Biochem* 59:417-9.
- 584 21. Lin AE, Au tran CA, Szyszka A, Escajadillo T, Huang M, Godula K, Prudden AR, Boons  
585 GJ, Lewis AL, Doran KS, Nizet V, Bode L. 2017. Human milk oligosaccharides inhibit  
586 growth of group B *Streptococcus*. *J Biol Chem* 292:11243-11249.
- 587 22. Ackerman DL, Doster RS, Weitkamp JH, Aronoff DM, Gaddy JA, Townsend SD. 2017.  
588 Human Milk Oligosaccharides Exhibit Antimicrobial and Antibiofilm Properties against  
589 Group B *Streptococcus*. *ACS Infect Dis* 3:595-605.
- 590 23. Craft KM, Thomas HC, Townsend SD. 2019. Sialylated variants of lacto-N-tetraose exhibit  
591 antimicrobial activity against Group B *Streptococcus*. *Org Biomol Chem* 17:1893-1900.
- 592 24. Craft KM, Thomas HC, Townsend SD. 2018. Interrogation of Human Milk Oligosaccharide  
593 Fucosylation Patterns for Antimicrobial and Antibiofilm Trends in Group B *Streptococcus*.  
594 *ACS Infect Dis* 4:1755-1765.



- 595 25. Craft KM, Gaddy JA, Townsend SD. 2018. Human Milk Oligosaccharides (HMOs)  
596 Sensitize Group B Streptococcus to Clindamycin, Erythromycin, Gentamicin, and  
597 Minocycline on a Strain Specific Basis. *ACS Chem Biol* 13:2020-2026.
- 598 26. Chambers SA, Moore RE, Craft KM, Thomas HC, Das R, Manning SD, Codreanu SG,  
599 Sherrod SD, Aronoff DM, McLean JA, Gaddy JA, Townsend SD. 2020. A Solution to  
600 Antifolate Resistance in Group B Streptococcus: Untargeted Metabolomics Identifies  
601 Human Milk Oligosaccharide-Induced Perturbations That Result in Potentiation of  
602 Trimethoprim. *mBio* 11.
- 603 27. Andreas NJ, Al-Khalidi A, Jaiteh M, Clarke E, Hyde MJ, Modi N, Holmes E, Kampmann B,  
604 Mehring Le Doare K. 2016. Role of human milk oligosaccharides in Group B  
605 Streptococcus colonisation. *Clin Transl Immunology* 5:e99.
- 606 28. Wilson CB, Weaver WM. 1985. Comparative susceptibility of group B streptococci and  
607 Staphylococcus aureus to killing by oxygen metabolites. *J Infect Dis* 152:323-9.
- 608 29. Chen P, Reiter T, Huang B, Kong N, Weimer BC. 2017. Prebiotic Oligosaccharides  
609 Potentiate Host Protective Responses against *L. Monocytogenes* Infection. *Pathogens* 6.
- 610 30. Coppa GV, Zampini L, Galeazzi T, Facinelli B, Ferrante L, Capretti R, Orazio G. 2006.  
611 Human milk oligosaccharides inhibit the adhesion to Caco-2 cells of diarrheal pathogens:  
612 *Escherichia coli*, *Vibrio cholerae*, and *Salmonella ftyris*. *Pediatr Res* 59:377-82.
- 613 31. Manthey CF, Autran CA, Eckmann L, Bode L. 2014. Human milk oligosaccharides protect  
614 against enteropathogenic *Escherichia coli* attachment in vitro and EPEC colonization in  
615 suckling mice. *J Pediatr Gastroenterol Nutr* 58:165-8.
- 616 32. Kavanaugh DW, O'Callaghan J, Butto LF, Slattery H, Lane J, Clyne M, Kane M, Joshi L,  
617 Hickey RM. 2013. Exposure of *Bifidobacterium longum* subsp. *infantis* to Milk  
618 Oligosaccharides Increases Adhesion to Epithelial Cells and Induces a Substantial  
619 Transcriptional Response. *PLoS One* 8:e67224.
- 620 33. Vrbanac A, Riestra AM, Coady A, Knight R, Nizet V, Patras KA. 2018. The murine vaginal  
621 microbiota and its perturbation by the human pathogen group B Streptococcus. *BMC*  
622 *Microbiol* 18:197.
- 623 34. Ward RE, Ninonuevo M, Mills DA, Lebrilla CB, German JB. 2006. In vitro fermentation of  
624 breast milk oligosaccharides by *Bifidobacterium infantis* and *Lactobacillus gasseri*. *Appl*  
625 *Environ Microbiol* 72:4497-9.
- 626 35. Underwood MA, Gaerlan S, De Leoz ML, Dimapasoc L, Kalanetra KM, Lemay DG,  
627 German JB, Mills DA, Lebrilla CB. 2015. Human milk oligosaccharides in premature  
628 infants: absorption, excretion, and influence on the intestinal microbiota. *Pediatr Res*  
629 78:670-7.
- 630 36. Sakanaka M, Gotoh A, Yoshida K, Odamaki T, Koguchi H, Xiao JZ, Kitaoka M, Katayama  
631 T. 2019. Varied Pathways of Infant Gut-Associated *Bifidobacterium* to Assimilate Human  
632 Milk Oligosaccharides: Prevalence of the Gene Set and Its Correlation with *Bifidobacteria*-  
633 Rich Microbiota Formation. *Nutrients* 12.
- 634 37. Marcobal A, Barboza M, Sonnenburg ED, Pudlo N, Martens EC, Desai P, Lebrilla CB,  
635 Weimer BC, Mills DA, German JB, Sonnenburg JL. 2011. Bacteroides in the infant gut  
636 consume milk oligosaccharides via mucus-utilization pathways. *Cell Host Microbe* 10:507-  
637 14.
- 638 38. Yu ZT, Chen C, Newburg DS. 2013. Utilization of major fucosylated and sialylated human  
639 milk oligosaccharides by isolated human gut microbes. *Glycobiology* 23:1281-92.
- 640 39. Pausan MR, Kolovetsiou-Kreiner V, Richter GL, Madl T, Giselbrecht E, Obermayer-  
641 Pietsch B, Weiss EC, Jantscher-Krenn E, Moissl-Eichinger C. 2020. Human Milk  
642 Oligosaccharides Modulate the Risk for Preterm Birth in a Microbiome-Dependent and -  
643 Independent Manner. *mSystems* 5.

- 644 40. Mandal S, Van Treuren W, White RA, Eggesbo M, Knight R, Peddada SD. 2015. Analysis  
645 of composition of microbiomes: a novel method for studying microbial composition. *Microb*  
646 *Ecol Health Dis* 26:27663.
- 647 41. France MT, Ma B, Gajer P, Brown S, Humphrys MS, Holm JB, Waetjen LE, Brotman RM,  
648 Ravel J. 2020. VALENCIA: a nearest centroid classification method for vaginal microbial  
649 communities based on composition. *Microbiome* 8:166.
- 650 42. Musilova S, Modrackova N, Hermanova P, Hudcovic T, Svejstil R, Rada V, Tejnecky V,  
651 Bunesova V. 2017. Assessment of the synbiotic properties of human milk  
652 oligosaccharides and *Bifidobacterium longum* subsp. *infantis* in vitro and in humanised  
653 mice. *Benef Microbes* 8:281-289.
- 654 43. Yu ZT, Nanthakumar NN, Newburg DS. 2016. The Human Milk Oligosaccharide 2'-  
655 Fucosyllactose Quenches *Campylobacter jejuni*-Induced Inflammation in Human  
656 Epithelial Cells HEp-2 and HT-29 and in Mouse Intestinal Mucosa. *J Nutr* 146:1980-1990.
- 657 44. Wang Y, Zou Y, Wang J, Ma H, Zhang B, Wang S. 2020. The Protective Effects of 2'-  
658 Fucosyllactose against *E. Coli* O157 Infection Are Mediated by the Regulation of Gut  
659 Microbiota and the Inhibition of Pathogen Adhesion. *Nutrients* 12.
- 660 45. Wu RY, Li B, Koike Y, Maattanen P, Miyake H, Cadete M, Johnson-Henry KC, Botts SR,  
661 Lee C, Abrahamsson TR, Landberg E, Pierro A, Sherman PM. 2019. Human Milk  
662 Oligosaccharides Increase Mucin Expression in Experimental Necrotizing Enterocolitis.  
663 *Mol Nutr Food Res* 63:e1800658.
- 664 46. Ruiz-Palacios GM, Cervantes LE, Ramos P, Chavez-Munguia B, Newburg DS. 2003.  
665 *Campylobacter jejuni* binds intestinal H(O) antigen (Fuc alpha 1, 2Gal beta 1, 4GlcNAc),  
666 and fucosyloligosaccharides of human milk inhibit its binding and infection. *J Biol Chem*  
667 278:14112-20.
- 668 47. Weichert S, Jennewein S, Hufner E, Weiss C, Borkowski J, Putze J, Schroten H. 2013.  
669 Bioengineered 2'-fucosyllactose and 3-fucosyllactose inhibit the adhesion of  
670 *Pseudomonas aeruginosa* and enteric pathogens to human intestinal and respiratory cell  
671 lines. *Nutr Res* 33:831-8.
- 672 48. Quinn EM, Slattery H, Thompson AP, Kilcoyne M, Joshi L, Hickey RM. 2018. Mining Milk  
673 for Factors which Increase the Adherence of *Bifidobacterium longum* subsp. *infantis* to  
674 Intestinal Cells. *Foods* 7.
- 675 49. Chichlowski M, De Lartigue G, German JB, Raybould HE, Mills DA. 2012. *Bifidobacteria*  
676 isolated from infants and cultured on human milk oligosaccharides affect intestinal  
677 epithelial function. *J Pediatr Gastroenterol Nutr* 55:321-7.
- 678 50. Zhang G, Zhao J, Wen R, Zhu X, Liu L, Li C. 2020. 2'-Fucosyllactose promotes  
679 *Bifidobacterium bifidum* DNG6 adhesion to Caco-2 cells. *J Dairy Sci* 103:9825-9834.
- 680 51. Facinelli B, Marini E, Magi G, Zampini L, Santoro L, Catassi C, Monachesi C, Gabrielli O,  
681 Coppa GV. 2019. Breast milk oligosaccharides: effects of 2'-fucosyllactose and 6'-  
682 sialyllactose on the adhesion of *Escherichia coli* and *Salmonella fytis* to Caco-2 cells. *J*  
683 *Matern Fetal Neonatal Med* 32:2950-2952.
- 684 52. Lin AE, Autran CA, Espanola SD, Bode L, Nizet V. 2014. Human milk oligosaccharides  
685 protect bladder epithelial cells against uropathogenic *Escherichia coli* invasion and  
686 cytotoxicity. *J Infect Dis* 209:389-98.
- 687 53. Fukuda S, Toh H, Hase K, Oshima K, Nakanishi Y, Yoshimura K, Tobe T, Clarke JM,  
688 Topping DL, Suzuki T, Taylor TD, Itoh K, Kikuchi J, Morita H, Hattori M, Ohno H. 2011.  
689 *Bifidobacteria* can protect from enteropathogenic infection through production of acetate.  
690 *Nature* 469:543-7.
- 691 54. Salli K, Anglenius H, Hirvonen J, Hibberd AA, Ahonen I, Saarinen MT, Tiihonen K,  
692 Maukonen J, Ouwehand AC. 2019. The effect of 2'-fucosyllactose on simulated infant gut  
693 microbiome and metabolites; a pilot study in comparison to GOS and lactose. *Sci Rep*  
694 9:13232.

- 695 55. He Y, Liu S, Kling DE, Leone S, Lawlor NT, Huang Y, Feinberg SB, Hill DR, Newburg DS.  
696 2016. The human milk oligosaccharide 2'-fucosyllactose modulates CD14 expression in  
697 human enterocytes, thereby attenuating LPS-induced inflammation. *Gut* 65:33-46.
- 698 56. Xiao L, van De Worp WR, Stassen R, van Maastrigt C, Kettelarij N, Stahl B, Blijenberg B,  
699 Overbeek SA, Folkerts G, Garssen J, Van't Land B. 2019. Human milk oligosaccharides  
700 promote immune tolerance via direct interactions with human dendritic cells. *Eur J*  
701 *Immunol* 49:1001-1014.
- 702 57. Andrade EB, Magalhaes A, Puga A, Costa M, Bravo J, Portugal CC, Ribeiro A, Correia-  
703 Neves M, Faustino A, Firon A, Trieu-Cuot P, Summavielle T, Ferreira P. 2018. A mouse  
704 model reproducing the pathophysiology of neonatal group B streptococcal infection. *Nat*  
705 *Commun* 9:3138.
- 706 58. Randis TM, Gelber SE, Hooven TA, Abellar RG, Akabas LH, Lewis EL, Walker LB, Byland  
707 LM, Nizet V, Ratner AJ. 2014. Group B Streptococcus beta-hemolysin/cytolysin breaches  
708 maternal-fetal barriers to cause preterm birth and intrauterine fetal demise in vivo. *J Infect*  
709 *Dis* 210:265-73.
- 710 59. Thurl S, Munzert M, Boehm G, Matthews C, Stahl B. 2017. Systematic review of the  
711 concentrations of oligosaccharides in human milk. *Nutr Rev* 75:920-933.
- 712 60. Soyilmaz B, Miks MH, Rohrig CH, Matwiejuk M, Meszaros-Matwiejuk A, Vigsnaes LK.  
713 2021. The Mean of Milk: A Review of Human Milk Oligosaccharide Concentrations  
714 throughout Lactation. *Nutrients* 13.
- 715 61. Rainey K, Michalek SM, Wen ZT, Wu H. 2019. Glycosyltransferase-Mediated Biofilm  
716 Matrix Dynamics and Virulence of *Streptococcus mutans*. *Appl Environ Microbiol* 85.
- 717 62. Davis EC, Wang M, Donovan SM. 2017. The role of early life nutrition in the establishment  
718 of gastrointestinal microbial composition and function. *Gut Microbes* 8:143-171.
- 719 63. Jantscher-Krenn E, Aigner J, Reiter B, Kofeler H, Csapo B, Desoye G, Bode L, van Poppel  
720 MNM. 2019. Evidence of human milk oligosaccharides in maternal circulation already  
721 during pregnancy: a pilot study. *Am J Physiol Endocrinol Metab* 316:E347-E357.
- 722 64. MacIntyre DA, Chandiramani M, Lee YS, Kindinger L, Smith A, Angelopoulos N, Lehne B,  
723 Arulkumaran S, Brown R, Teoh TG, Holmes E, Nicholson JK, Marchesi JR, Bennett PR.  
724 2015. The vaginal microbiome during pregnancy and the postpartum period in a European  
725 population. *Sci Rep* 5:8988.
- 726 65. Freitas AC, Hill JE. 2018. Bifidobacteria isolated from vaginal and gut microbiomes are  
727 indistinguishable by comparative genomics. *PLoS One* 13:e0196290.
- 728 66. Rubio-Del-Campo A, Gozalbo-Rovira R, Moya-Gonzalvez EM, Alberola J, Rodriguez-Diaz  
729 J, Yebra MJ. 2021. Infant gut microbiota modulation by human milk disaccharides in  
730 humanized microbiome mice. *Gut Microbes* 13:1-20.
- 731 67. Pace RM, Chu DM, Prince AL, Ma J, Seferovic MD, Aagaard KM. 2021. Complex species  
732 and strain ecology of the vaginal microbiome from pregnancy to postpartum and  
733 association with preterm birth. *Med (N Y)* 2:1027-1049.
- 734 68. Arnold JW, Whittington HD, Dagher SF, Roach J, Azcarate-Peril MA, Bruno-Barcena JM.  
735 2021. Safety and Modulatory Effects of Humanized Galacto-Oligosaccharides on the Gut  
736 Microbiome. *Front Nutr* 8:640100.
- 737 69. Jantscher-Krenn E, Zherebtsov M, Nissan C, Goth K, Guner YS, Naidu N, Choudhury B,  
738 Grishin AV, Ford HR, Bode L. 2012. The human milk oligosaccharide disialyllacto-N-  
739 tetraose prevents necrotising enterocolitis in neonatal rats. *Gut* 61:1417-25.
- 740 70. Patras KA, Derieux J, Al-Bassam MM, Adiletta N, Vrbanac A, Lapek JD, Zengler K,  
741 Gonzalez DJ, Nizet V. 2018. Group B Streptococcus Biofilm Regulatory Protein A  
742 Contributes to Bacterial Physiology and Innate Immune Resistance. *J Infect Dis* 218:1641-  
743 1652.

- 744 71. Patras KA, Coady A, Babu P, Shing SR, Ha AD, Rooholfada E, Brandt SL, Geriak M, Gallo  
745 RL, Nizet V. 2020. Host Cathelicidin Exacerbates Group B Streptococcus Urinary Tract  
746 Infection. *mSphere* 5.
- 747 72. Lum GR, Mercado V, van Ens D, Nizet V, Kimmey JM, Patras KA. 2021. Hypoxia-Inducible  
748 Factor 1 Alpha Is Dispensable for Host Defense of Group B Streptococcus Colonization  
749 and Infection. *J Innate Immun* doi:10.1159/000515739:1-13.
- 750 73. Patras KA, Wescombe PA, Rosler B, Hale JD, Tagg JR, Doran KS. 2015. Streptococcus  
751 salivarius K12 Limits Group B Streptococcus Vaginal Colonization. *Infect Immun* 83:3438-  
752 44.
- 753 74. Patras KA, Doran KS. 2016. A Murine Model of Group B Streptococcus Vaginal  
754 Colonization. *J Vis Exp* doi:10.3791/54708.
- 755 75. Caporaso JG, Lauber CL, Walters WA, Berg-Lyons D, Lozupone CA, Turnbaugh PJ,  
756 Fierer N, Knight R. 2011. Global patterns of 16S rRNA diversity at a depth of millions of  
757 sequences per sample. *Proc Natl Acad Sci U S A* 108 Suppl 1:4516-22.
- 758 76. Gonzalez A, Navas-Molina JA, Kosciolk T, McDonald D, Vazquez-Baeza Y, Ackermann  
759 G, DeReus J, Janssen S, Swafford AD, Orchanian SB, Sanders JG, Shorenstein J, Holste  
760 H, Petrus S, Robbins-Pianka A, Brislawn CJ, Wang M, Rideout JR, Bolyen E, Dillon M,  
761 Caporaso JG, Dorrestein PC, Knight R. 2018. Qiita: rapid, web-enabled microbiome meta-  
762 analysis. *Nat Methods* 15:796-798.
- 763 77. Bolyen E, Rideout JR, Dillon MR, Bokulich NA, Abnet CC, Al-Ghalith GA, Alexander H,  
764 Alm EJ, Arumugam M, Asnicar F, Bai Y, Bisanz JE, Bittinger K, Brejnrod A, Brislawn CJ,  
765 Brown CT, Callahan BJ, Caraballo-Rodriguez AM, Chase J, Cope EK, Da Silva R, Diener  
766 C, Dorrestein PC, Douglas GM, Durall DM, Duvallet C, Edwardson CF, Ernst M, Estaki M,  
767 Fouquier J, Gauglitz JM, Gibbons SM, Gibson DL, Gonzalez A, Gorlick K, Guo J, Hillmann  
768 B, Holmes S, Holste H, Huttenhower C, Huttley GA, Janssen S, Jarmusch AK, Jiang L,  
769 Kaehler BD, Kang KB, Keefe CR, Keim P, Kelley ST, Knights D, et al. 2019. Reproducible,  
770 interactive, scalable and extensible microbiome data science using QIIME 2. *Nat*  
771 *Biotechnol* 37:852-857.
- 772 78. McMurdie PJ, Holmes S. 2013. phyloseq: an R package for reproducible interactive  
773 analysis and graphics of microbiome census data. *PLoS One* 8:e61217.
- 774 79. Team RC. 2013. R: A Language and Environment for Statistical Computing, R Foundation  
775 for Statistical Computing, Vienna, Austria. <http://www.R-project.org/>.
- 776 80. Wickham H. 2016. ggplot2: Elegant Graphics for Data Analysis. Springer-Verlag New  
777 York.
- 778 81. Waskom M. 2021. seaborn: statistical data visualization. *Journal of Open Source Software*  
779 doi:10.21105/joss.03021.

780

781

782

783

784

785

786 **FIGURE LEGENDS**

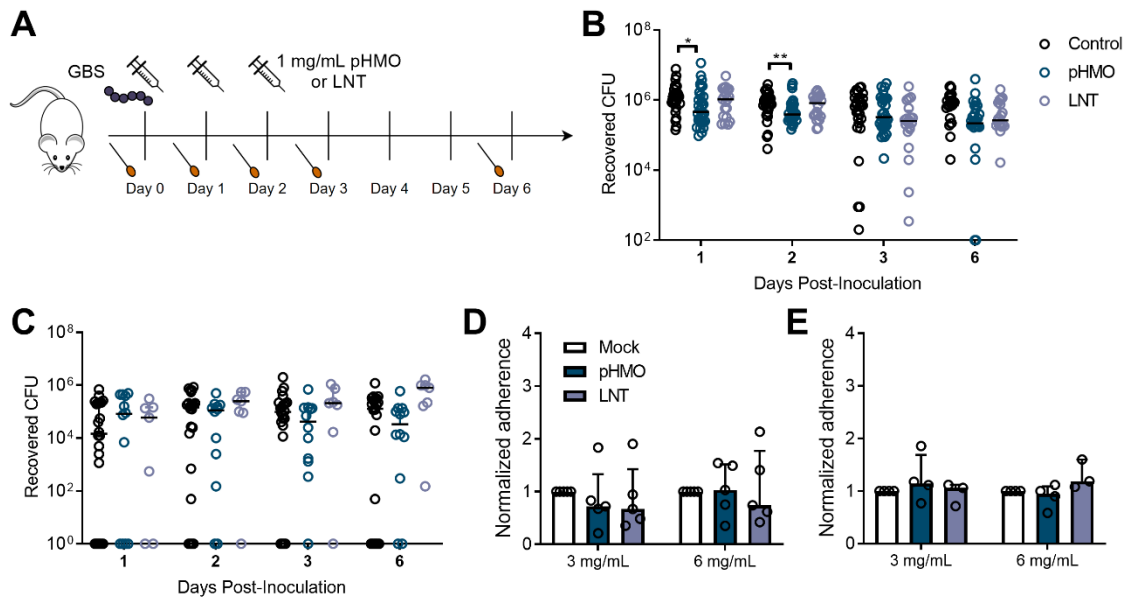

787

788 **Figure 1. Treatment with pHMOs, but not specific HMO LNT, reduce GBS vaginal**  
789 **burdens in mice and do not impact adherence to human vaginal epithelial cells.** (A)  
790 Experimental timeline for the GBS colonization model. Baseline vaginal swabs were  
791 collected on Day 0 prior to GBS inoculation with  $1 \times 10^7$  CFU of GBS COH1. Mice were  
792 treated with 1 mg pHMOs or lacto-N-tetraose (LNT) two hours post-infection, and on the  
793 two subsequent days. Mice were swabbed prior to daily treatment with HMOs, as well as  
794 one and four days after the last HMO treatment. Mouse and syringe images are available  
795 open source through pixabay. (B) GBS burdens recovered from mouse vaginal swabs  
796 over the 6-day time course ( $n = 20-30$ /group). (C) *Enterococcus* spp. burdens recovered  
797 from mouse vaginal swabs over the 6-day time course. Mice that did not culture  
798 *Enterococcus* at any time point were excluded ( $n = 7-22$ /group). Adherence of GBS COH1  
799 (D) or *Lactobacillus rhamnosus* GG (E) to VK2 cells pretreated with pHMOs or LNT for  
800 18 h. Adherence was normalized to mock treated controls. Symbols represent individual  
801 mice (B, C), or the means of 4-5 independent experimental replicates (D,E), with lines  
802 representing median and interquartile range. Data were analyzed by Kruskal Wallis with  
803 Dunn's multiple comparisons test (B,C) or two-way ANOVA with Dunnett's multiple  
804 comparisons test (D,E). \*\*  $P < 0.01$ , \*  $P < 0.05$ . All other comparisons are not significant.



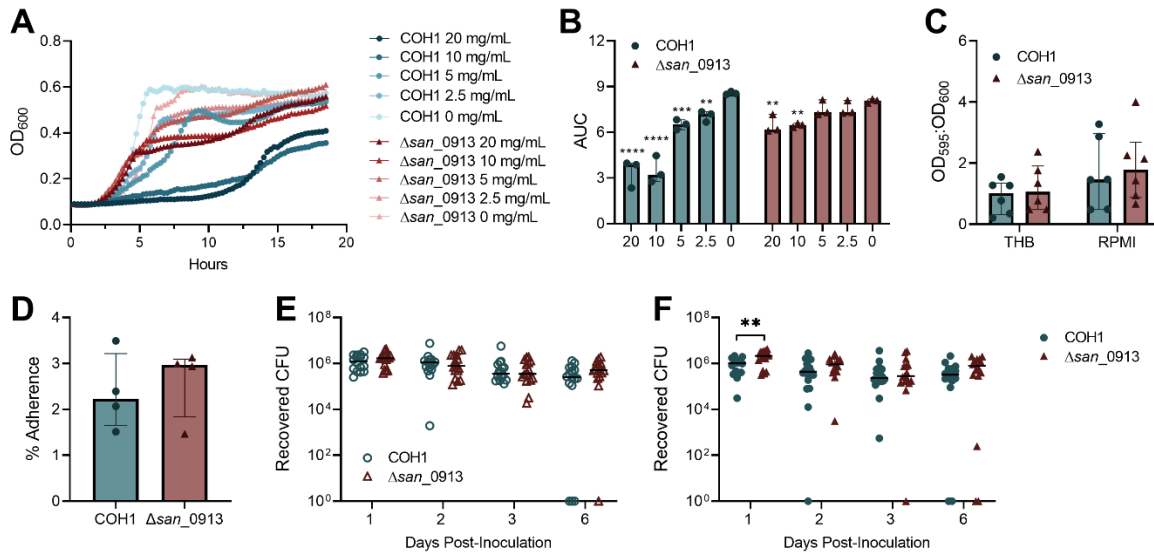

805

806 **Figure 2. HMO resistance conferred by disruption of *san\_0913* does not alter GBS**  
 807 **biofilms, adherence, or *in vivo* colonization in the absence of HMOs.** (A) Growth  
 808 curves of WT COH1 and  $\Delta san\_0913$  in RPMI-1640 supplemented with 0, 2.5, 5, 10, or  
 809 20 mg/mL pHMOs and cultured for 18 h as measured by optical density ( $OD_{600}$ ). (B) Area  
 810 under curve analysis of growth curves from (A). Comparisons shown are to 0 mg/mL  
 811 pHMO controls. (C) Biofilm formation of COH1 and  $\Delta san\_0913$  in THB or RPMI-1640  
 812 quantified by crystal violet staining and expressed as a ratio of crystal violet absorbance  
 813 over total bacterial biomass ( $OD_{595}:OD_{600}$ ). (D) Percent adherence of COH1 and  
 814  $\Delta san\_0913$  to VK2 cells after 30 min of infection, MOI = 1. (E) Mice were vaginally  
 815 inoculated with  $1 \times 10^7$  CFU of COH1 or  $\Delta san\_0913$ , and vaginally swabbed at indicated  
 816 time points. Recovered GBS CFU recovered from swabs are shown. (F) Mice were  
 817 inoculated as in (E) and treated with pHMOs as indicated in Fig. 1A. Recovered GBS  
 818 CFU recovered from swabs are shown. Symbols represent the median of three  
 819 independent experiments (A), means of three to six independent experiments (B-D) or  
 820 individual mice from two combined independent experiments ( $n = 16/\text{group}$ , E,F). Lines  
 821 indicate median values and interquartile ranges. Data were analyzed by two-way  
 822 repeated measures ANOVA with Dunnett's multiple comparisons test (B), two-way  
 823 ANOVA with Sidak's multiple comparisons test (C), Wilcoxon matched-pairs signed rank  
 824 test (D), or two-stage Mann-Whitney test (E,F). \*\*\*\*  $P < 0.0001$ , \*\*\*  $P < 0.001$ , \*\*  $P < 0.01$ ,  
 825 \*  $P < 0.05$ . All other comparisons are not significant.

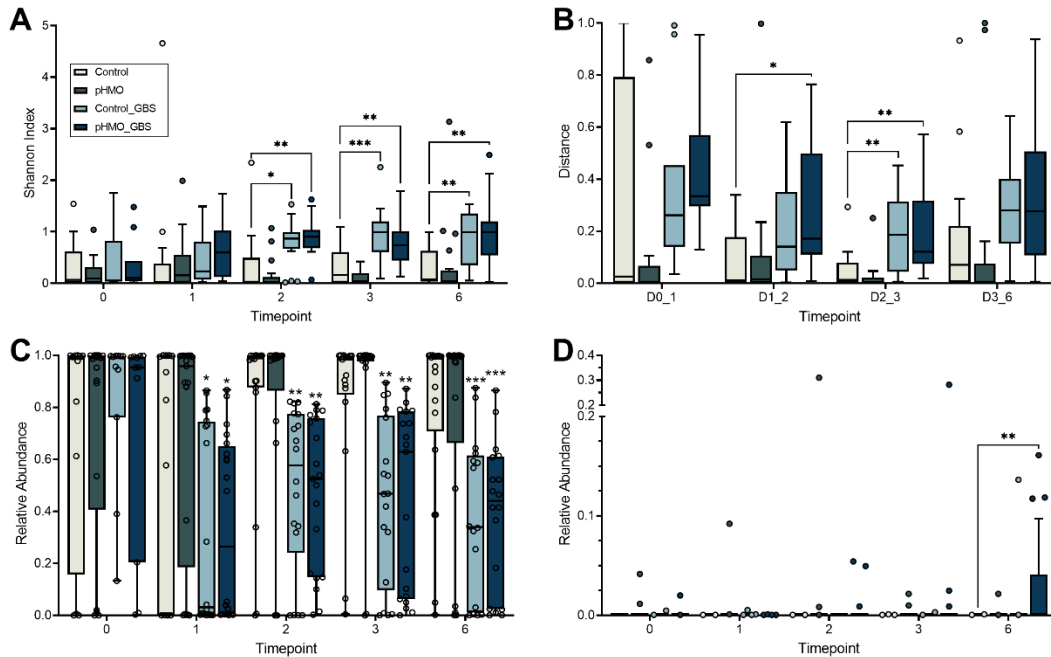

826

827 **Figure 3. Alpha and beta diversity and differential taxa abundance as measured by**  
828 **16S rRNA amplicon sequencing.** Mice were mock-infected or GBS-infected and treated  
829 with pHMOs or mock-treated: Control (mock-treated, mock-infected), pHMO (treated,  
830 mock-infected), Control\_GBS (mock-treated, GBS-infected), and pHMO\_GBS (treated,  
831 GBS-infected) as described in Materials and Methods. (A) Shannon's diversity index of  
832 vaginal 16S amplicon sequencing from each condition over the time course. (B) Bray-  
833 Curtis pairwise distances between subsequent time points. Relative abundance of *S.*  
834 *succinus* (C) and *Bacteroides spp* (D) according to treatment group over time. Displayed  
835 as Tukey's box plot (A,B,D) and min-to-max box and whisker plots (C),  $n = 11-21$ /group  
836 per time point. Data were analyzed by two-way repeated measures ANOVA with Tukey's  
837 multiple comparisons test. All comparisons shown are to the Control group. \*\*\*  $P < 0.001$ ,  
838 \*\*  $P < 0.01$ , \*  $P < 0.05$ . All other comparisons are not significant.

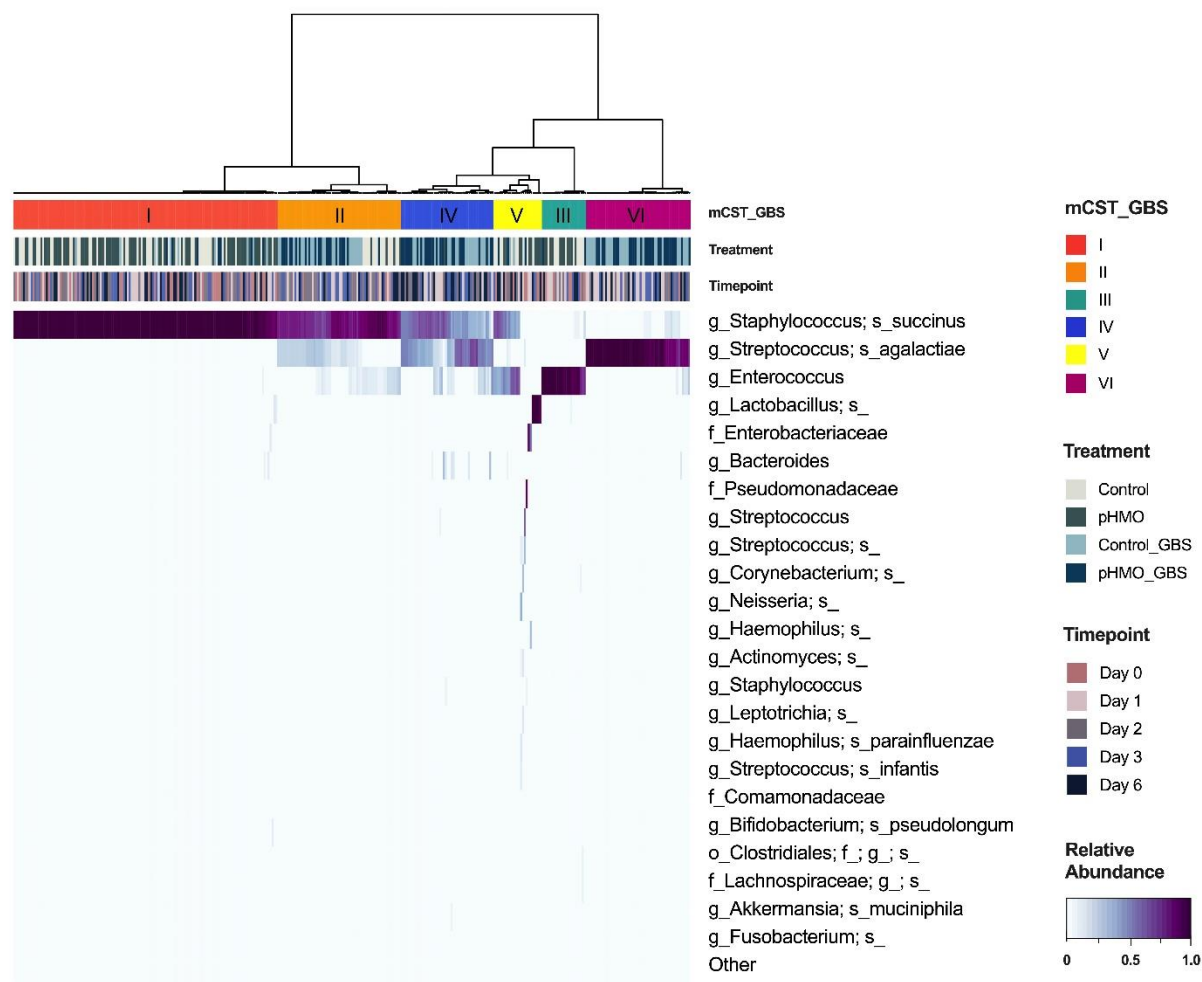

840 **Figure 4. Heatmap of murine community state types across treatment groups and**  
841 **time points.** Relative abundances of the top 23 taxa in mice across all four treatment  
842 groups as determined by 16S rRNA amplicon sequencing ( $n = 20-24$  mice/group). Murine  
843 samples are hierarchically clustered by Ward's linkage of Euclidean distances to generate  
844 mCSTs (top bar). Treatment (middle bar) and timepoint (bottom bar) per sample are  
845 displayed above the heatmap. Highest to lowest taxonomic abundances are shown by  
846 heatmap intensity corresponding to the colorbar (indicated in lower right corner) ranging  
847 from dark purple to white.



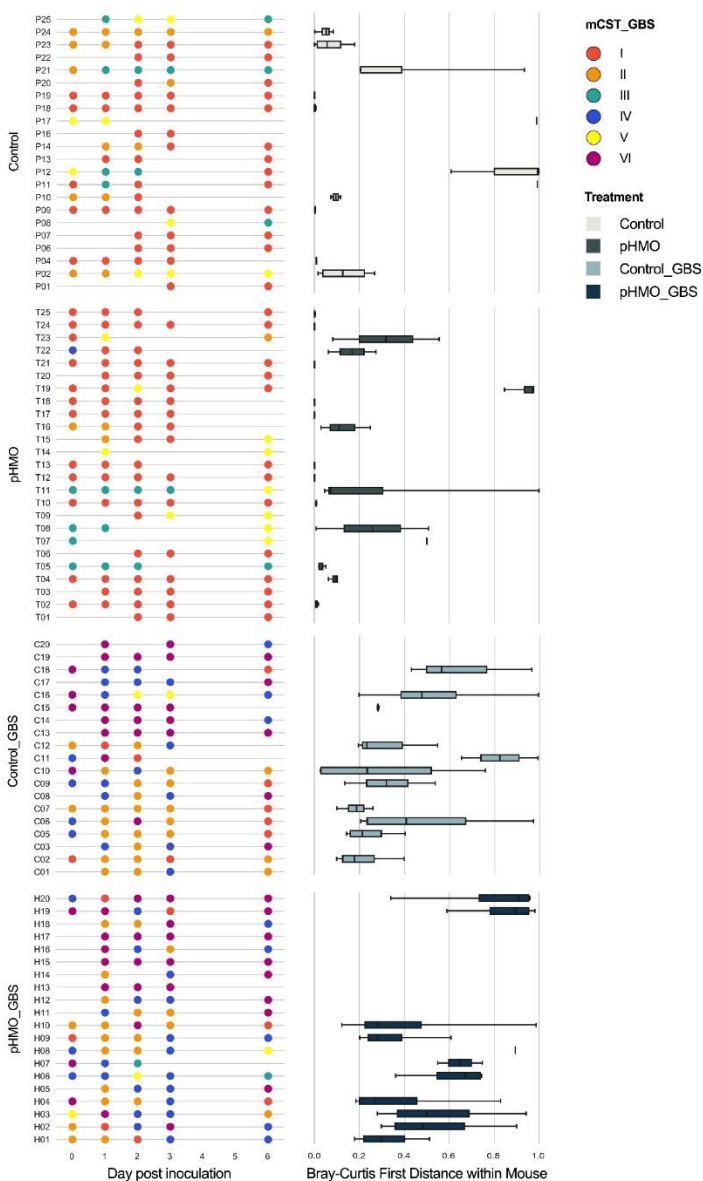

848

849 **Figure 5. Vaginal microbiome stability over time with pHMO treatment and/or GBS**  
 850 **infection.** mCST designations for mouse cohort samples are displayed ordered by  
 851 treatment group and time point (left panels). For each mouse, corresponding Bray-Curtis  
 852 first distances from the day 0 time point are shown (right panels). Mice with less than two  
 853 sequenced samples were excluded from analysis, and mice without a sequenced day 0  
 854 sample were excluded from the first distance analysis ( $n = 20-25/\text{group}$ ). Data were  
 855 analyzed by Mann-Whitney test.

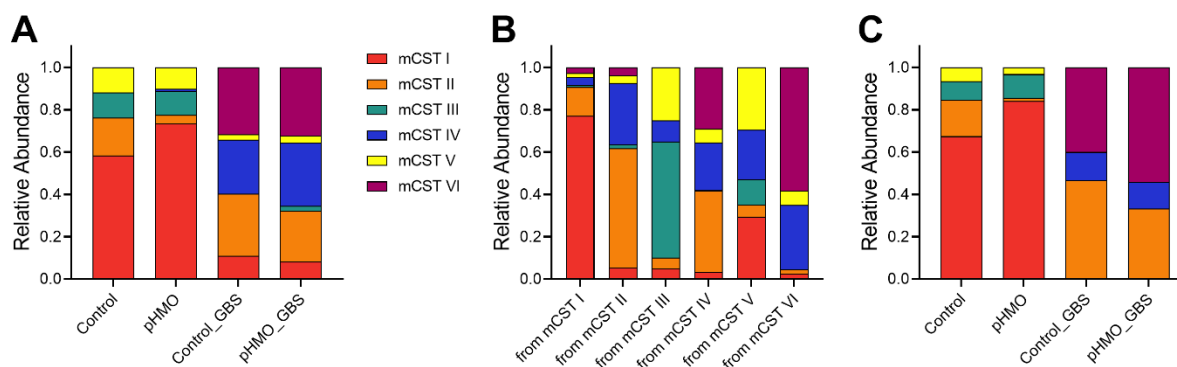

856

857 **Figure 6. Frequency and transitions of mCSTs across treatment groups.** mCST  
858 designations for mouse cohort samples were combined from all time points. (A)  
859 Frequency of mCST appearances within treatment groups. (B) Proportion of samples  
860 designated to each mCST grouped by the mCST from the previous time point. A self-  
861 transitioning mCST would be designated from a mCST to the same mCST at the next  
862 time point (e.g., from mCST I to mCST I). (C) Relative proportions of mCSTs that self-  
863 transitioned at the next time point separated by treatment group. Data were analyzed by  
864 chi square test.

865

866
